# Supplementary material for: Hairless as a novel component of the Notch signaling pathway
Source: bioRxiv preprint, doi:10.1101/621367, version 2 (2019-04-30)
Supplement: Supplementary file 5 [file 621367_file15.docx]

**Supplementary file 5.** **Full-length S-CAP sequences**

>Strigamia maritima (centipede; Geophilomorpha)

MPNPNCETCESSQNNKRKCENNANVQSGNKKRSTDPNECQQPAQSAHDFLKKLVHEQKLHAPTLFNNTNELKPENNRTGSSENDTNGKLSFYLDGRFILELEHKPGGKRRNGGWIQTKGITWMPRPEEEKLINPIKQELKESETSRMKLKNLKRFSSQRETTNACSVVLFNFRINRRRDFKHFPRLNAYYLRKAARHPFSIDLFFFSKSEKCKTAPPSTKLVKKRTKRLNDLFRPPEFVNSTADNVKRWFDEVGSVKVKCEPDNASLPLPEWYLDPSKSQIPVNEMIGNPRPYLPAAPTHYDDKESNVNSMSEPLDLRTNVVRETKRDEWMKREAKEHPGNAFYVGLIPFPLPGHGEYSAPSAVQPWPCVSCPVVAYAPTVVNSYYYCCCFLPGCRSNCLCKTEGKQLTSRSSEIPKECDCATDLTNACNKKFPIPVAVKSDHQTPGKKTDVGDGCSHSMLKDLLLMPSSEKDCHCPQTSNP

>Nephila clavipes (spider; Araneae)

MDKCSTDAEFDSYWDYEAKNKNRNRIRVGRQYQATIPPLLKPGQKDGRKSEELETLKWKPDQLSDQALEEYLSMAKGIGLFSKSLDSPKPSEKSDNSLQSAIKGLSEFVTSHHPCHHDDGCKVARPSSSGESSSKSTATSDWSPSEAQLFAQALEACGKNFGAIKKEYLPWKPIKSIIEYYYEGKNEKLEASSEAETSGKISPKKELGSPASYKEEKDFIKEEVLPDEAVPEGSIPEDPPKDAINFLENTRVTDPCRATPVELKMSVNENDIVTASSTVASLKFFLGGRLVLKLNAQQDSGSGTKCQWVQSNDLPKHSNNIKKDRQKKKCIQDESFVINPDVHKLKKKTEELSSASNELTDCDPSAVKKAKLKSEYDFPLCSSSWTPPVADGQESIEVDDASSKTSEGYISPVLSNSRFSKADAKLDSVSNFNSVGDPKCDSDMCWVKSEMKGCNISSDHCNDSASKNICMLGGKNSPNHMSDVSPYKQEVLNHKSALSHKTCVKSLCYQPHTSHSNRSLSKQWSKRSNMTYPMRTSPCSLSPISVVDLKSPSKETPLDLSSKLDNVLNDIDHHNSQSAHKTKVQVDNAEKIMPSESESRPASSEFSPQSSNHGSLAQSIDSPYKDTINSHKCSEDTASDHQQCEKCLRQEDSDFSSGKDSENSCQLPYTYCNLPYQCALPKCTKDCLLEEHLCNKSDAEKSQAGSPGYIINDVDENFCKKNPAWCSRSGASYYPYYSQCYPYYLSYGVAPSHVSEPTIAEVPLDLSSTNDKVKENSSETEKLPEEVNVMNSDDTDAVERGMLYQLLKNKTSK

>Parasteatoda tepidariorum (spider; Araneae)

MDKCSTDAEFDSYWDNEAKNQNRNRIRVGRQYQATIPPLLKPGEKDGRKLEDLETLKWKPDQLSDQKLEEYMSMAKGISLFSKSVSSSRSPEKSDNSLQSAIKGLTEFVASHHPCHHDDGCRQVLKPSSSSTESVSKVNTNTWSQSEAQLFAQALEACGKNFSAIKKEFLPWKPVRSIIEYYYQIKNEKAEETEPTDKVIPKAEEEPIPSCSHEEKPCVKEEPVKVEEPQVKTVNTEDPPKDSINFLDHSRVTDPCSAASETSLPQDVPATSTVGSLKFFLGGRLVLKLNAQQDGGSGNKCQWVQSNDLPKHSNHNKKDKHKKKFAPYSYSSSGTQKPLKKGDDTSAVPDCDPSGIKKPRLKEYETSENSALGLLLCSSSWTPPVADGQESIDVDDTSSKTSEGYISPILSNNSRTSKIDTIKHDFASNPNTSNELGEQKCDSDPTWVKTDNCIISDSASKNASVLSGKNSPNQCYSSPMKKEVLNHKSALSHGRSVKSPCYQSRSSHSSSPLLKQRNIKWSNIPYPLKSSPSSLSPVYIDLRSSTKESAIDLSSKSDNGLNNADHYVKQTHSNERSECNECILCESDSRPDSEFSPQSSNFTPSAESPRKEPSCTACNCCEGVSTDQLPFDNSGRKEDETMTNKESDDNSQLSYTYCNLPYHCALPKCTKDYTLEEHLCNKSSINKNQVDCPEYIINDIDENMCEKNPNWCSKASYIPYYSHCYPYYVSYGVTSRNSAESTDTEVSEAPLDLSSTNETKPEKLPNVEKISENSSEEVSQNAEGGRGMLYQLLKNKSK

>Stegodyphus mimosarum (spider; Araneae)

MDKCSSDAEFDSYWDYEAKNKNRNRIRVGRQYQATVPPLLKPGEKDGRKCEELETLKWKPGQLSEQEVEQYLSMAKGIGLFAKAVDSPKIPEKSDSSLQSAIKGLSEFVASHHPCHHDDGCQVPKPSSSGETDSKVNATNDWSPSEAQLFAQALEACGKNFCAIKKDFLPWKPVRSIIEYYYHGKGEKTENLADDSDTKLPEKKEEDEPVASCSHTEKSSESEMLPSDEPQSEDLNVEEPTEPTKESVLFLENSRVIDHCQAVPELKMSVTEDGMPASSTVGSLKFFLGGRLVLKLNARQDSGSGSKCQWVQSNDLPKHSNTTKKVKHKKKSMQDGSFPASDIFKQQKKSEELCISNRVSDYDTSVVKKPKLKLEHISHLDKQELLLCSSSWMPPVADGHESVEIDDGSSKTSEGNGNVSPVLSNPRSIKADVKTDFASNFVNELGEQNCDSDPCWVKLESQCGNVATESSFVDNSASKCVSYVGENNSPNQFIDDSSFKQEVLNMSALSHNKAHTKNQCYQPLTSHSNSPLLKQWSKSPNPVKTSPSSLSPVSLIDTKSPVKDIPLDLSSKLENSINSTDHHDMMDIHKPTVKVECSNQSFPSETETSPVNCEFSPQSSKLGSHVQSNESWRKETKNNVYQNSEDKADPLQYVKEENNEYSPKKRCGDPSQLPYYCNLPYHCASPKCTKDYSLEEHLCNKSNVEKNQENDPSYILQNVDENVCKKSPWCSGTVASYLQLYPPCYRSYYYSYGMAPSPASEPTIAEVPLDLSSAGESIAEKIAMPENLPEDITDVSQTNTEAVERGMLYQLLKNKTSK

>Achipteria coleoptrata (mite; Oribatida)

MDVSNSDADFDSYWEEEARNPNRNRIRIGRQYQATVPPILKQGESDGRKLEELETLRWKPDNELTDQQLDQYLSVAKAVSLFTRAIDNNYSQSNVNSDSHIENDETNETNSNSNQNTNRDKTENKNDKNKDNTLSPGSTSTVKDNRIQSALKGLSDFVSSHHPNHRDIGCRTPLLPETTANSAESESANSLTNLLSAEWNSNEIKLFSRALEVCGKNFGAIKKDFLPWKSVTSIIERYYLGIGRDGPNSGIKHEEQNNINQSGNSQNNKQESVPNTFVSDILSSVSKFMTSYTDAKPELNECQRTQSSQMSSEDIKDCDLKNNFNSEDSKIASVSGQEVKPLKAKPILPTAIQESNNSVSTVGSLKFYLDGQLVLKLNAQQEMMGQKCQWVESSDTAKKARLLHKTKKRLLNERHDSDVTNHSNHKNSNSEELDDGSNESSDDDSMESNESALVPSPSAFIAKKAKVKVENSSHKPLSSPTSLPMKDSKLDVSNRNVKIECSNSSVKKEVHLSPNSNHCEDEHKKRFSSEHTNERTNSQNCLENKWYHTIVEKSSLQPPKAHSMTSSGPLYRHSRYDSVQSSLGSSSSTSSPSSSSSSGTGVPLMSSNAIPVDLTRKSTNYSPFEAKSSSLSSSSTPDFGNYPERDKNSKVLSSPSPPRLQPPFVFPYPAYLPLSPTQSQNKIKREKEVKSSNNLCQKAVEGRPLVKSSPPTSPSLMAPSSTPPLPSALPSPSQLAWIQNSFAPYLPIYEQYYRYYYGYGMPSPNHSPGERMSSSQTPKENEANSKERAKCLTDAVLVDGDDANCGS

>Sarcoptes scabiei (mite; Astigmata)

MLDIDFDSYWDEEARNPNRNRIRIGRQYQAQCPALLKSGQNDGRKLEDLETLTWNPNNPLNIHQLNQYFSIAKSIGLFIQAIDTCQDGIDEIECLEEEKCSTRPFQILDSGTKCILEAKPDRTVQSSNDNNNVINTSVSIPEKHQSDKVTTRQRIQHHHKSNHKEDSVEVTSQSSSNSSSSSSTTSNSLSTSPLKQTSNTRIQSIAKGLPAFILSHHSKNMREEKITDDDDYESKNNKGKNDDELQDSKCKFKSTTAEQAINLGSVEKYDVKKLANLLMGKWNATEAKVFAQAFNQCGKNFMAIKKDYLPWKSIRSIIEYYYLTCDKEKEELRKQRRNRAKSNRNCFSLNENRTNTTKPPSSSDNSDEINYESAKKFSTDIDGSNPKFNISQNSNQKSNDDRTRLSPNKQSNLSEQDLFNLMLMKGGLKNGNINLDAIADFTNSRFKFNNTNNNCNINGGNSAFIQSSSESKNSFVPGQEVRPVKAKPIFSQTDPSSSQLNEADSSKTNLGSLNLYLHGELVLRLNAQQQDSGQKWVESNEIQSSFKDDADDFSCGGADVSASDDDSLTSNESSSLVASSPSSSSTIATSSAKKSRVKLEHQNSNFPSNSQNSSISSPVSSHRNKNESNFNGGALNNPFPNTSQSLINSISALAAASSFLENPLSELEIKKRLFEYCQMGMSVEELQLLLASNLFPDPPKAHSNTPCLAATVPHIGTNVTDKTTTQNVSEKDSVYRSSPVKEHQRSSKSSSKQSKIVSNDLDNADNGYTNGFGPIDLTRRKSSINHNPFNSISNEMGSKNHSPKSKQSFSASTSNNLLNRSNCSLFSLPTLSSSSPSSLSSSTLSNPNGTGRNSTIVSPAKFSSNSHSSKSMKNNYNSKKKSSSSSSSSSISIAETNPF

>Metaseiulus occidentalis (mite; Mesostigmata)

MDSNNDVDFDAYWEEESRNKYRNRIRVGRQYQASVPPLLRPGESDDRQLEDLETQYWKPSLDDEAIHEYLSMAKAVSVFSCSLESQSHDNLQSAIRGLTEFVMKHHDPCHRDAGCRMSVKSSWTNKEAELLACALERCENANRKKMAEEYDESGSDDADGVDETSDIEADCQPSSTSALELPIDVNPPSEIKPVPARVIGRKTDSPVSDSGSPTGPAQATGTAAGGATPVSAKSRADGANTSQQLQDPSAAGQGSLKFYLKGQLILKLNAHQERKTWVEDPDNPAASSGQFGGVAGALSGGQNRRKAGRKANRSSTTSGPISWLDRGSPSLESTSSLDSHNSTSTSATTPTCAAATPTPSTTAATSTAATNALPAGGNNGGGGGGSSSSSSSSCSSSSSSAASSAANPVSQQPAPLDLSSQQS

>Dinothrombium tinctorium (mite; Trombidiformes)

MDVSTSDADFDSYWEEEARNPNRNRIRIGRQYQATVPPLLRPGESDGRKLEDLETLKWKPENDLSDQQLDQYLSLAKAVALFARAITNNSSANQTDSESAHSNGNSGNNTNSNSENQADEEQNSTSQEDKKNAENTDSFVSQPSDHLQCALKGLSDFVTSHHPFSRDAGCKVPINSSDKSATSSSQSNSENFTNSTKLNWTSDESDIFAKALDACGKNFSAIKKDFLPWKSVQSIIAYYYLGLNRTKLDTNCSDKNIKAFSSNDEKDCTTPKMSKDCSALINVATTSTASSPNSPTFSLSPIMNTACKDYSSKKHVNGVSNSLIECDSNSKQNEANCVNLEIKALKAKPVLPSNDDLSCNMSNLGSLKFYMDGQLVLKLNAKQEVTGRKCQWVESQDTPKFSRPVRKGNKKLLLEKSESDSKIGHVHNDKCMHQSNEDGEEGSLDSSDEDSLESSESNAVLSPMSVTSRKAKVKVENNCFVPLPSPCGVSGSKDQSLNRSNSTNESPTSVVKKEPLCSPTSSSNQKNDIEAKRKLKVPPWPPDKKKSLFITATDNKWSIAEKNVKPPEAHAASRILNSGSYSSSAVPVDLTRKSSAYSPNGTKSHSSLSSSSSTSGDAEKISSSPAQLNYPTSLTPNSLSSSQKQSKSAKDLKPIEMCQKEKSPKSDKLSAEKTNSVSNASLAWFQSPLVSYLPIYEQYYQYYCRYGFPPLPNTAASCESKSNKTSNH

>Ixodes scapularis (tick; Ixodida)

MPNSNRLLARRPPCEVPLDADFDSYWENESRNNNRNRIRVGRQYQATVPALLRPGESDGRRLEDLETLRWRPESLSDQSIDEYLSMAKAVSLFARAMDKWQAWGEGGPEGCCLQTALRGLSDFVTSHHGCHHDAGCQVGPTLPCHWTPTEASLFARALDECGKNFGAIKKDFLPWKPVKSLIEFYYQGRMPKQESDGQEQEAGCSTSTGASCTSNCSTSKCTANCTSNCISNCIKNCIKKEVKEEPVEEDEEEEREEEKQKGEEPPPEGTAEEAPGVSGPEVKPMRAKPVKAAEEGPASVAPVGSLKFFLGGRLVLKLSAQEGGAWVEAQDTPRLGRPRQPPPDDASDEEEPSPPGSGGGGPPQKGTSRCTSWPETATPAPASSSAGGASASTPEENNTQNSTEEEEAGDESPPLPAPLREASPKCLPPPASAAPVTGAGTLPPPGCAERCRPLSGWRSPRGAVPFLGPLFAAQCCPTTFLPASTADAPLDLSSPVDAKKLPLVPK

>Centruroides sculpturatus (scorpion; Scorpiones)

MFRLMDASNSDADFDSYWEDQSRNRNRNRIRVGRQYQATVPPLLKPGETDGRCCEDLETLKWKPDNDLSDQQIDQYLSMASRAVSLFAKAIDTCQNTGNGPDKTLQTALRGLSDFVTSHHPCHHDAGCQVPSPSCCGDHNCKHSIKNGWTPTEAQLFARALEACGKNFGAIKKEFLPWKPVRSIIEFYYNGKEEKYDNQSARQSQQIANLSENLITGKENISEAHNLKNEDEEDDDDDDEVDKLEDCDCKLEKTDSKSDHDTETQNEKTSKLNQPNNESTSFNLGSLSFFLGGQLVLKLNAQQENGPDNQNCQWVLSQDTPKLPPNRKGRKSKKSCKQGSITSIGKEEIQQTKNEKKQEFCMEEREEGSGVKKAKLKTDCIHSSSMEEASDFCNMPWLPPTETKQERTEKCDDTLYKTETWCHSFSSLCLSQCKNENCTHKDKNCLKNTGLLNSEDNITSTIKTEPGLSPSYIMNSNVSLKEEDSKESVVSMKSYLKALSVPSSSLSSQNWVEHSNIWRNSTKFNEILTKKETWSHSQTLQDSDGGPLDLSIKNSEKNLSKSCEALTSEKSLTVHDSVASDTQMCPFIKSSTCQKRTSVSTSIKDSLSLNDMSQTNMPLDGWSVQVSHGLPYVKGETVKKDCHSSQLLSKGYPLSCEYSRYGMTVTYAPTVFPPVYNCKKDPTNKDKPVNLSKKNENFTCEENNSTRELEVDERCSESGVDLVPWVVAPILSYGQMHSPFCSCCVTYTDSMGMNRLSDQPQGDSETPLDLSSSSSSSSSSSSSSDTTDITDFHKPKNENVAD

>Limulus polyphemus (horseshoe crab; Xiphosura)

MDASSDADFDSYWEDESKSKNRNRIRVGRQYQATVPQLLKPGESDGRQLEDLETLKWKPNNDLSDQQLDQFFSVARAVSFFARAIDKYQHSDKESDKCIQTALRGLTEYVTSHHPCHHDANCQLSQGSSDPQPSGSNSSNDWTYGEAQLFARALEACGKNFGAIKKDFLPWKPVKSIIEYYYQGKEERPNSSHNNLGEPSTSMFSVVEPKKEIIDCDDLGDPHTSPDSGSSEEPDNSIPEERIDEPSDDKQDDETGSHPNLPTTSLTAEVLEVKPMKAKPVTATLDLETSPLGSLQFYFHGKLVLKLNAQQHANTNGHQCQWVPSVDTPKVPFPCSAGQCKKKYVELYEDSRTVDGADLQEVEGGFSKKAKLKNDFAIVWPEESFGAPVHSPQSPALSEWRHRGRATPYDGTLSPFSGVCSDPSDSDISPLQSPTDKCSTKKILGPSELCSVKDDLCIKPEPVSPCSHPTHNIEGRKIPFYSSCHKQDPQKFNTLEEVKRPFSQVNCTDVSQQIECSVPISYPSMLKTVLEATDKTGYKHLLSSSYKLSNVKQEVPLDLSIKSSQPSVNKLHAVETNCQTDGKLNSCSHKQKQLSSSWPDETLSHPPGLNTRRSSKQIKRSSFSSPDVRPSVSSFKSLTSSPVGGISKQHSADNKWTSINAKPLTLPPVISSATNTLHPGSATWTSFSANPDILSPTHTWEKSDATVASLTSYQEQHSGLTYLSMPIYNMAYPYPANCVENVNGVSASTEVNYFSQKNSPIKLKNMEDVTSSPSSKEKEIPAWVTNRPTDLTSYIPLYPHIYSYYPYAYNLSQVSWNGAVTPTEASDAPLDLSSPPSDNIPCSPKQKETIVGSSRAVQVPKDETDKDELSKLSNKSDDFSPSVSLGF
